# Supplementary material
Source: PubMed Central journal article supplement (PMC4097255)
Supplement: ijcep0007-2743-f10.pdf [file ijcep0007-2743-f10.pdf]

## IDO1 in ESC induces macrophage tolerance via IL-33

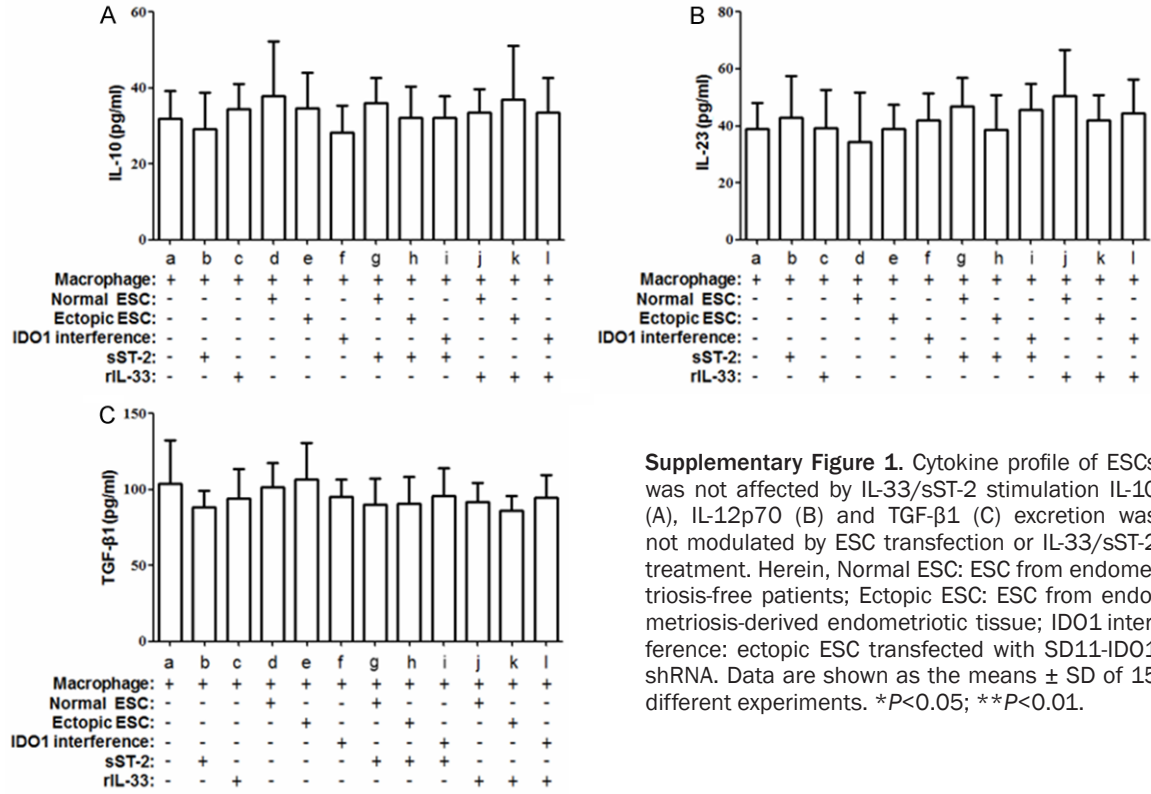

**Supplementary Figure 1.** Cytokine profile of ESCs was not affected by IL-33/sST-2 stimulation. IL-10 (A), IL-12p70 (B) and TGF-β1 (C) excretion was not modulated by ESC transfection or IL-33/sST-2 treatment. Herein, Normal ESC: ESC from endometriosis-free patients; Ectopic ESC: ESC from endometriosis-derived endometriotic tissue; IDO1 interference: ectopic ESC transfected with SD11-IDO1 shRNA. Data are shown as the means ± SD of 15 different experiments. \* $P < 0.05$ ; \*\* $P < 0.01$ .
